# Supplementary material for: Very Low Ventricular Pacing Rates Can Be Achieved Safely in a Heterogeneous Pacemaker Population and Provide Clinical Benefits: The CANadian Multi-Centre Randomised Study-Spontaneous AtrioVEntricular Conduction pReservation (CAN-SAVE R) Trial
Source: PubMed Central journal article supplement — J Am Heart Assoc. 2015 Jul 23;4(7):e001983. doi: 10.1161/JAHA.115.001983 (PMC4608083; doi:10.1161/jaha.115.001983), 2015-07-23
Supplement: jah30004-e001983-sd1.pdf [file jah30004-e001983-sd1.pdf]

**SUPPLEMENTAL MATERIAL****APPENDIX****CAN-SAVE R Study Investigators:**

Edmonton, Grey Nuns Hospital (AB): Dr Mano Senaratne;

Edmonton, Royal Alexandra Hospital (AB): Dr Randy Williams;

Institut Universitaire de Cardiologie et de Pneumologie de Québec (IUCPQ, PQ): Dr Louis Blier, Dr Jean Champagne, Dr Marcel Gilbert, Dr Franck Molin, Dr Isabelle Nault, Dr Gilles O'Hara, Dr François Philippon, Dr Jean-François Sarrazin;

Kingston, Kingston General Hospital (ON): Dr Hoshiar Abdollah, Pr Adrian Baranchuk, Dr F. James Brennan, Dr Damian Redfearn, Dr Glorianne Ropchan, Pr Christopher Simpson;

Montreal, Institut de Cardiologie de Montréal (PQ): Dr Marc Dubuc, Dr Pierre Gagne, Dr Peter Guerra, Dr Paul Khairy, Dr Laurent Macle, Dr Denis Roy, Dr Mario Talajic, Dr Bernard Thibault;

Saint-Jérôme, Hôtel-Dieu (PQ): Dr Serge McNicoll;

Trois-Rivières, Centre Hospitalier Régional (PQ): Dr Miguel Barrero, Dr Ariel Diaz, Dr Carl-Eric Gagne, Dr Pierre B. Gervais, Dr Mark Garand, Dr Catherine Lemay, Dr Alain Raymond, Dr Alain Rheault;

Saskatoon, Royal University Hospital (SK): Dr Carlo Stuglin;

Toronto, St. Michael's Hospital (ON): Dr Kamrad Ahmad, Dr Paul Dorian, Dr Victoria Korley, Dr Iqwal Mangat, Dr Arnold Pinter;

Toronto, Southlake Hospital (ON): Dr Yaariv Khaykin, Dr Bernice Tsang, Dr Atul Verma, Dr Zaev Wulffhart.

**Adverse Events Review Board:**

Dr Isabelle Greiss; Hôtel-Dieu de Montréal, Montréal, PQ.

Dr Miguel A. Barrero Garcia; Centre Hospitalier Régional de Trois-Rivières, Trois-Rivières, PQ.

Dr Jean-François Sarrazin; IUCPQ, Québec, PQ.

**Echocardiography Core Center:**

Drs Anique Ducharme, Céline Pître, Myriam Proulx-Clément and Halyna Prylutska; Institut de Cardiologie de Montréal, Montréal, PQ.

**Study Coordinators:**

Edmonton, Grey Nuns Hospital (AB): Bernadette Fernando, Shannon Chanin, Himani Ferdinandis, Marleen Irwin, Dinazi Perera, Robin Varughese.

Edmonton, Royal Alexandra Hospital (AB): Sue Fisher, Linda Kvill, Lynn Zinger.

Institut Universitaire de Cardiologie et de Pneumologie de Québec (PQ): Michele Buys-Topart, Lyne Charbonneau, Caroline Duval, Marie-Claude Fortin, Jacinthe Harnois, Caroline Roy, Marie-Pierre Simard, Lucie Tellier.

Kingston, Kingston General Hospital (ON): Gwen Ewart, Sharon Fair, Sharlene Hammond, Alecia Jones.

Montreal, Institut de Cardiologie de Montréal (PQ): Dominique Aubin, Luc Harvey, Anna Proietti, David Proult, Edith Simard.

Saint-Jérôme, Hôtel-Dieu (PQ): Nathalie Richer.

Trois-Rivières, Centre Hospitalier Régional (PQ): Francine Boulay.

Saskatoon, Royal University Hospital (SK): Nancy Zacher, Lynn Zinger.

Toronto, St. Michael's Hospital (ON): Suzan O'Donnell, Zana Mariano.

Toronto, Southlake Hospital (ON): Annette Nath, David Partridge, Sherrie Patterson, Kellie Winger.
